# Supplementary material for: Characterization of Polysaccharidic Associations for Cosmetic Use: Rheology and Texture Analysis
Source: MDPI journal article supplement (doi:10.3390/cosmetics8030062), 2021-06-26
Supplement: s1 [file s1]

Archive with 1 entries (1 files):
- cosmetics-1222806-supplementary.pdf
