# Supplementary material for: Characterization of Polysaccharidic Associations for Cosmetic Use: Rheology and Texture Analysis
Source: MDPI journal article supplement (doi:10.3390/cosmetics8030062), 2021-06-26
Supplement: s1 [file s1 › cosmetics-1222806-supplementary.pdf]

**Table S1:** samples submitted to rheological and texture analyses and concentration of the polymers used alone or in association.

| SAMPLES       | A     | G     | C     | P     |
|---------------|-------|-------|-------|-------|
| A 1.5%        | 1.5%  | -     | -     | -     |
| G 1.5%        | -     | 1.5%  | -     | -     |
| A 1.5%        | -     | -     | 1.5%  | -     |
| P 4%          | -     | -     | -     | 4.00% |
| G-C 1-2 0.75% | -     | 0.25% | 0.50% | -     |
| G-C 1-2 1%    | -     | 0.33% | 0.66% | -     |
| G-C 1-2 1.5%  | -     | 0.50% | 1.00% | -     |
| G-C 1-3 0.75% | -     | 0.19% | 0.56% | -     |
| G-C 1-3 1%    | -     | 0.25% | 0.75% | -     |
| G-C 1-3 1.25% | -     | 0.31% | 0.94% | -     |
| G-C 1-3 1.5%  | -     | 0.38% | 1.13% | -     |
| A-C 2-1 1.5%  | 1.00% | -     | 0.50% | -     |
| A-C 3-1 1.5%  | 1.13% | -     | 0.38% | -     |
| A-C 3-2 1.5%  | 0.90% | -     | 0.60% | -     |
| A-C 3-2 1.75% | 1.05% | -     | 0.70% | -     |
| A-C 3-2 2%    | 1.20% | -     | 0.80% | -     |
| A-C + P1%     | 1.25% | -     | 1.00% | 1.00% |
| A-C + P2%     | 1.25% | -     | 1.00% | 2.00% |

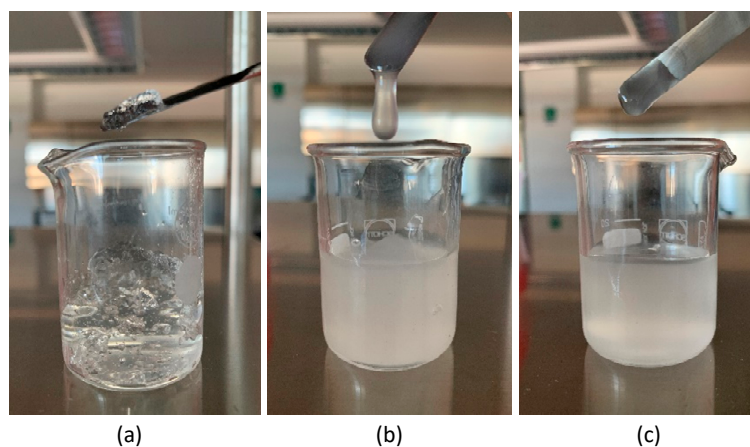

**Figure S1:** G water dispersion G (a), C water dispersion (b), and G-C water dispersion at ratio 1:3 (c) at a concentration of 1.5% w/w.

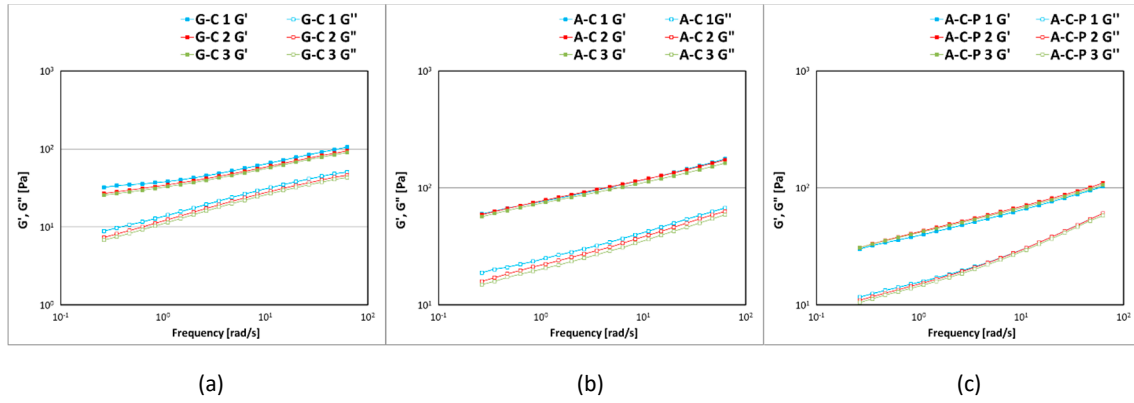

**Figure S2:** storage  $G'$  and loss  $G''$  moduli as a function of the frequency applied for the samples containing the polysaccharidic associations G-C (a), A-C (b), and A-C-P (c). The analysis was repeated three times.

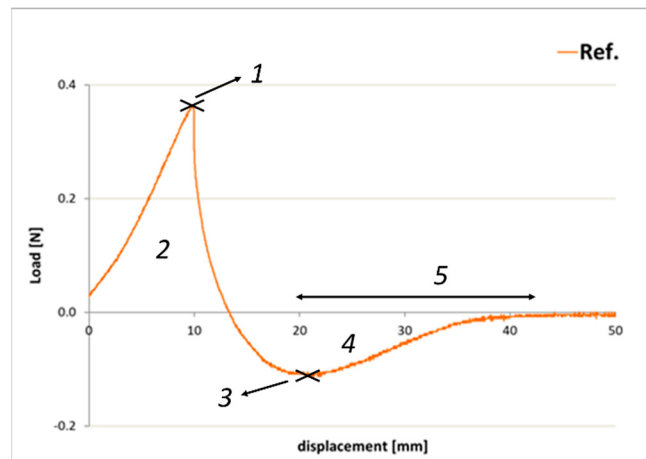

**Figure S3:** curve obtained with an immersion/de-immersion test, performed with a Texture Analyser, and the definitions of the calculated parameters: firmness (1), consistency (2), cohesiveness (3), adhesiveness (4), stringiness (5). Data plotted as load vs cumulative displacement.
